# Supplementary material for: A therapeutic exercise program for adolescents engaged in gender diversity services: study protocol for a non-randomised clinical trial
Source: publisher site journal article supplement (doi:10.1515/teb-2025-0020), 2025-09-05
Supplement: Supplementary file 1 [file j_teb-2025-0020_suppl_005.docx]

|  | **The Movement Program Interview Guide – Movement Program Participant** |
| --- | --- |
| **All questions asked post intervention** | It is okay not to answer any questions if you do not feel comfortable. Please do not feel any pressure, this interview is about the development of The Movement Program and all information will be de-identified. |
| Movement Program Experience | The next series of questions is about your experience as a Movement Program participant. |
|  | How did you find out about The Movement Program? |
|  |  |
|  | Why did you decide to join the Movement Program? Were there any aspects that were particularly appealing? Were there any that turned you off from participating? |
|  |  |
|  | Before I ask you questions about specific parts of the program, can you describe your overall experience with the Movement program?  *Prompt - What aspects from the Movement program do you believe helped you most?  *Prompt - What aspects helped you the least? |
|  |  |
|  | Regarding the exercise during the sessions, can you describe your overall experience with the exercise instructor? |
|  |  |
|  | Regarding the exercise during the sessions, can you describe your overall experience with the other program participants? |
|  |  |
|  | Can you describe the sort of relationship you formed with the exercise instructor / group participants? |
|  |  |
|  | Can you tell me more about the support you received from the exercise instructor and/or program participants during the Movement Program? |
|  |  |
|  | With the exercise instructor, you planned exercise for outside of the sessions, can you describe any exercise you completed outside of the sessions? How did you find the home exercises? |
|  |  |
|  | Do you find that your physical fitness has improved? |
|  |  |
|  | Do you find your quality of life and wellbeing have improved? |
|  |  |
| Initial Assessment Experience | During your first consultation, you completed an assessment with the program coordinator, can you describe this experience? How did the program coordinator make you feel? |
|  |  |
| Recommendations | The next questions are about your recommendations for the Movement Program. |
|  |  |
|  | How do you think this program complements your on-going treatment with the GDS? In what ways could we make the program more effective? |
|  |  |
|  | How do you think we could more effectively assist GDS clients in continuing to do exercise following the Movement Program? |
|  |  |
|  | Can you describe any ways in which the Movement Program could be more enjoyable as an experience? |
|  |  |
|  | Can you describe any barriers that you experienced in the Movement Program? |
|  |  |
|  | How do you think these barriers could best be overcome to appeal to more people? |
|  |  |
|  | Are there any recommendations you have for further developing the Movement Program? Can you elaborate on that? |

|  | **The Movement Program Interview Guide - Parent/Carer** |
| --- | --- |
| **All questions asked post intervention** | It is okay not to answer any questions if you do not feel comfortable. |
| Movement Program Experience | The next series of questions is about your child’s experience in the Movement Program participant. |
|  | How did you find out about The Movement Program? |
|  |  |
|  | Why did you decide your child join the Movement Program? Were there any aspects that were particularly appealing? Were there any that turned then off from participating? |
|  |  |
|  | Overall were you satisfied with the program? |
|  |  |
|  | Has your child benefited from this program?  If so, how?  If not, why not? |
|  |  |
|  | How valuable do you think this program is to enhance the physical health, mental health, social, participation/adherence of the children? |
|  |  |
|  | Have you notice any changes in your child’s physical activities or physical abilities? |
|  |  |
|  | Have you noticed any changes in your child’s mood, QofL, Wellbeing? |
|  |  |
|  | Was attended once per week feasible for you and your child? |
|  |  |
|  | What were the best parts about the Movement Program for your child? |
|  |  |
|  | What were the worst parts about the Movement Program for your child? |
|  |  |
| Recommendations | The next questions are about your recommendations for the Movement Program. |
|  |  |
|  | How do you think this program complements your child’s on-going treatment with the GDS? In what ways could we make the program more effective? |
|  |  |
|  | Would you recommend this program to other parents and families- why/why not? |
|  |  |
|  | Can you describe any barriers that you experienced in the Movement Program? |
|  |  |
|  | How do you think these barriers could best be overcome to appeal to more people? |
|  |  |
|  | Would it be feasible for you/your family to pay for the program? |
|  |  |
|  | Are there any recommendations you have for further developing the Movement Program? Can you elaborate on that? |

|  | **The Movement Program Interview Guide - Exercise Instructors** |
| --- | --- |
| **All questions asked post intervention** | It is okay not to answer any questions if you do not feel comfortable. Please do not feel any pressure, this interview is about the development of Stride and all information will be de-identified. |
| Individual Background  Experience | Can you describe your previous experiences with treating clients who present may disengaged, marginalised and/or at-risk of poor health? |
|  |  |
|  | Can you describe your experience signing up for the Movement Program? |
|  |  |
| Training  Experience | Regarding the training you received specifically for the Movement Program, before the intervention commenced, can you provide me with your overall experience? |
|  | What training materials do you believe were most useful as a Movement Program Instructor? |
|  |  |
|  | Can you provide and detail recommendations for the development of the Movement Program training? |
|  |  |
| Coordinator Relationship  Experience | Can you describe your overall experience with the Movement Program project coordinator? |
|  |  |
|  | Do you believe the Movement Program project coordinator provided you with enough support? Can you elaborate on this? |
|  |  |
|  | Is there any way in which you think the Movement Program can provide more support for Exercise Instructors? |
|  |  |
| Client Relationship  Experience | The next series of questions is about your experience with the intervention participants. |
|  |  |
|  | Can you describe your overall experience as an Exercise Instructor? |
|  |  |
|  | Can you describe your experience with your participants? |
|  |  |
|  | Can you describe any and all the challenges you faced with your participants? |
|  |  |
|  | Can you describe which Movement Program elements worked well? Can you describe which Movement Program elements did not work well? |
|  |  |
|  | Can you share any thoughts about the effects of the Movement Program on you as an Accredited Exercise Physiologist? |
|  |  |
|  | What aspects from the Movement Program do you believe helped your participants most? What aspects do you believe helped least? |
|  |  |
|  | What were the barriers you faced with motivating your participants to be physically active? |
|  |  |
|  | Can you elaborate on any ways in which the Movement Program could minimise these barriers? |
|  |  |
|  | Can you share your thoughts on how the Movement Program compliments on-going treatments for clients who are marginalised, disengaged and/or at risk of poor health |
|  |  |
| Recommendations | Are there any recommendations you have for further developing the Movement Program? Can you elaborate on that? |
